# Supplementary material for: NiFe-CN catalysts derived from the solid-phase exfoliation of NiFe-layered double hydroxide for CO2 electroreduction
Source: Royal Society of Chemistry journal article supplement (doi:10.1039/d2nj02234f), 2022-01-01
Supplement: d2nj02234f1.pdf [file d2nj02234f1.pdf]

**Electronic Supplementary Information (ESI)**  
**for New Journal of Chemistry**

**NiFe-CN catalysts derived from Solid-phase  
Exfoliation of NiFe-Layered Double  
Hydroxide for CO<sub>2</sub> Electroreduction**

Yingke Fu<sup>a</sup>, Lin Chen<sup>a</sup>, Ying Xiong<sup>a\*</sup>, Hao Chen<sup>a</sup>, Ruishi Xie<sup>a</sup>, Bin Wang<sup>a</sup>, Yaping Zhang<sup>a</sup>, Tianxia Liu<sup>b\*</sup>, Ping Zhang<sup>a\*</sup>

*<sup>a</sup>State Key Laboratory of Environment-friendly Energy Materials, School of Materials Science and Engineering, Southwest University of Science and Technology, Mianyang, 621010, PR China*

*<sup>b</sup>School of Chemistry and Chemical Engineering, North Minzu University, Yinchuan 750021, China*

## **Table of Contents**

1. Supplemental Figures
2. Supplemental Tables
3. References

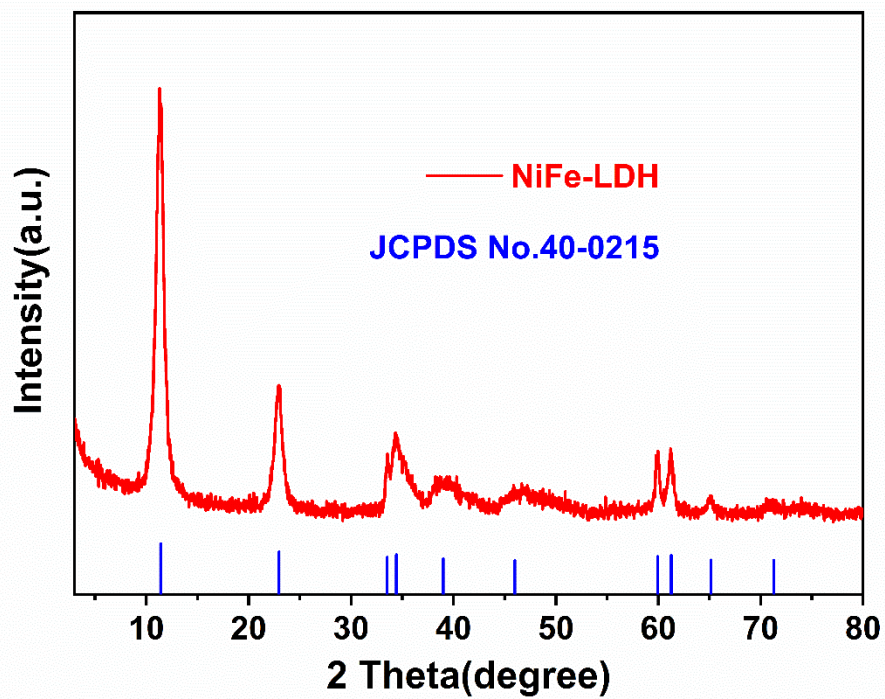

Figure S1. XRD pattern of NiFe-LDH

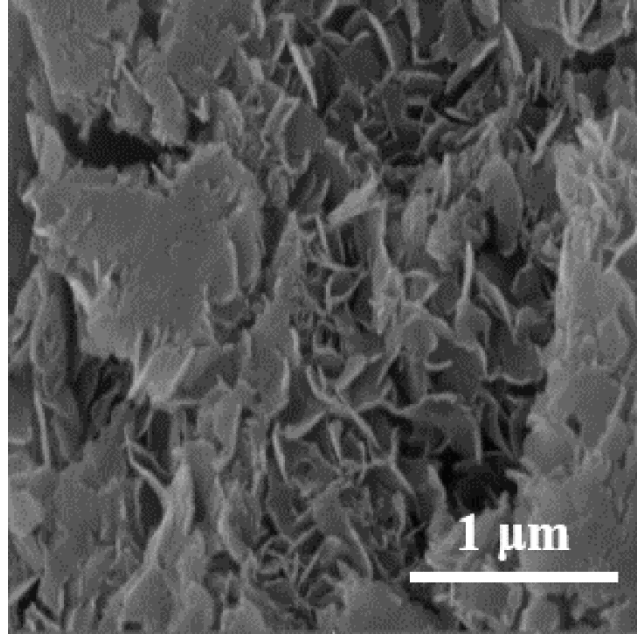

**Figure S2.** SEM image of NiFe-LDH.

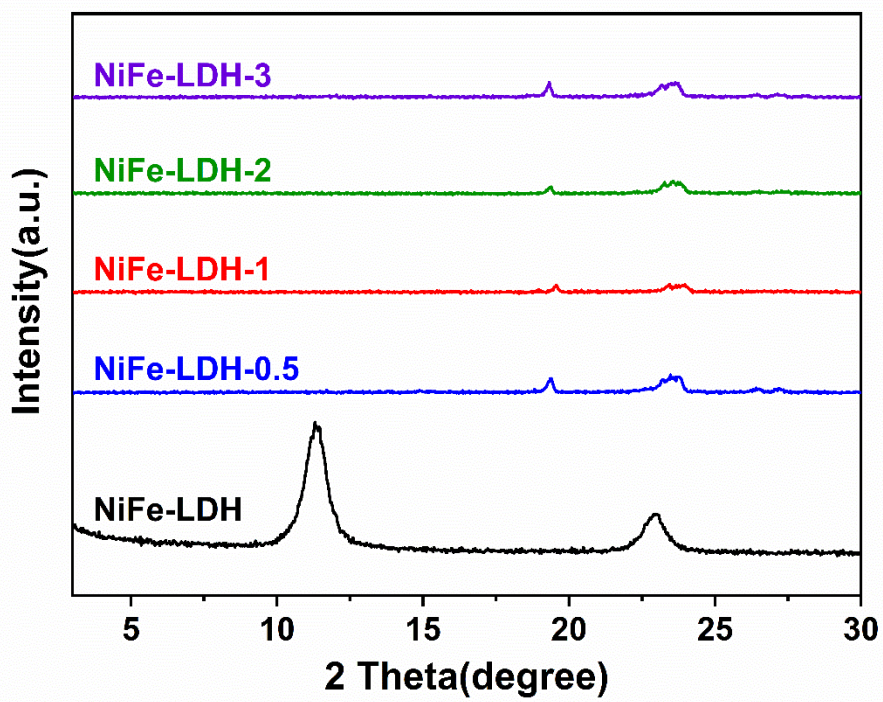

Figure S3. XRD pattern of exfoliated NiFe-LDH

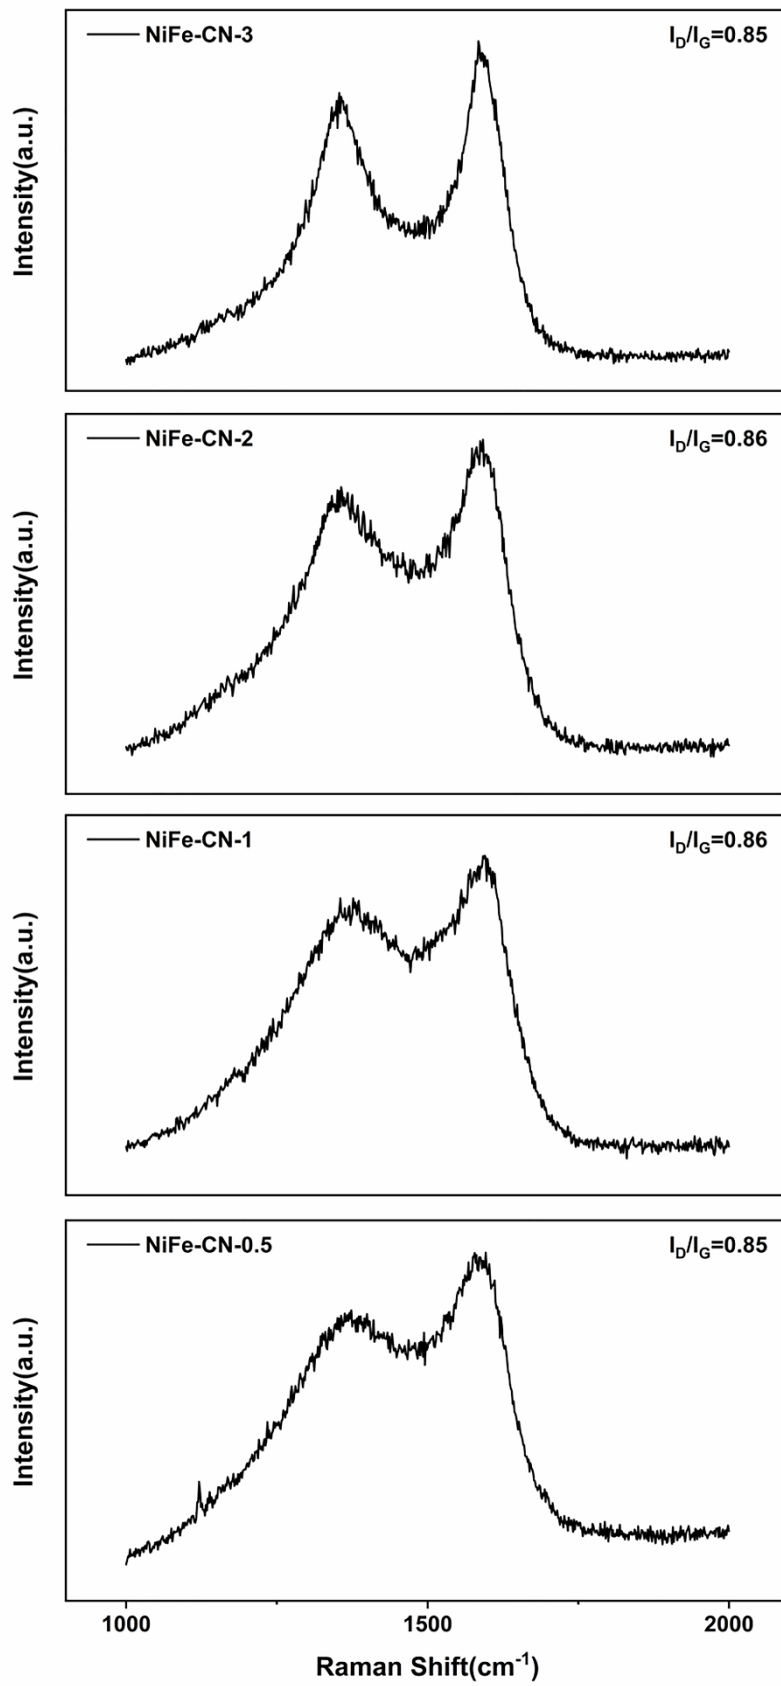

Figure S4. Raman spectrum of NiFe-NC-0.5, NiFe-NC-1, NiFe-NC-2, and NiFe-NC-3.

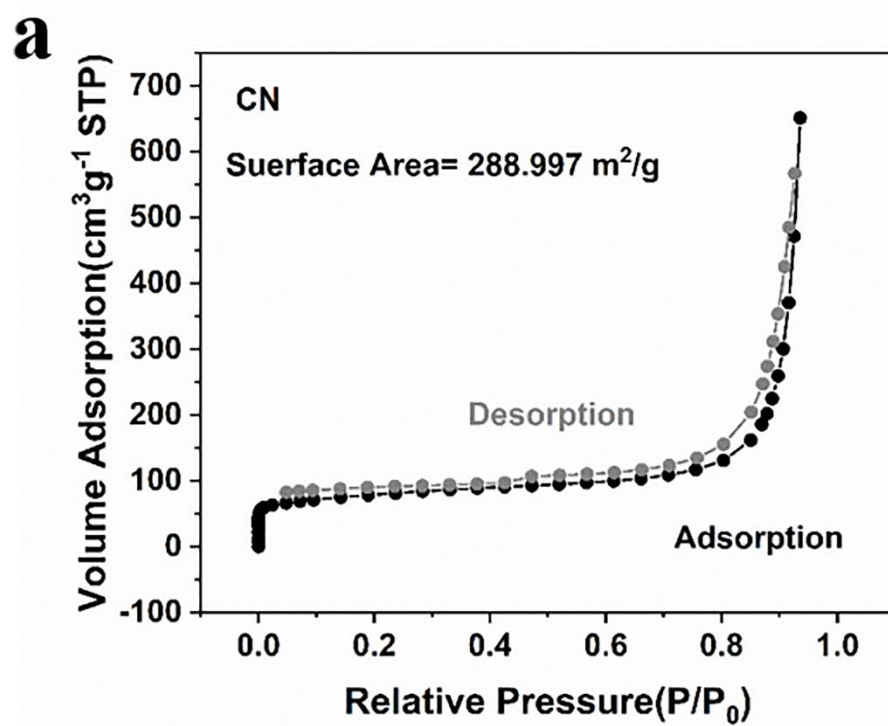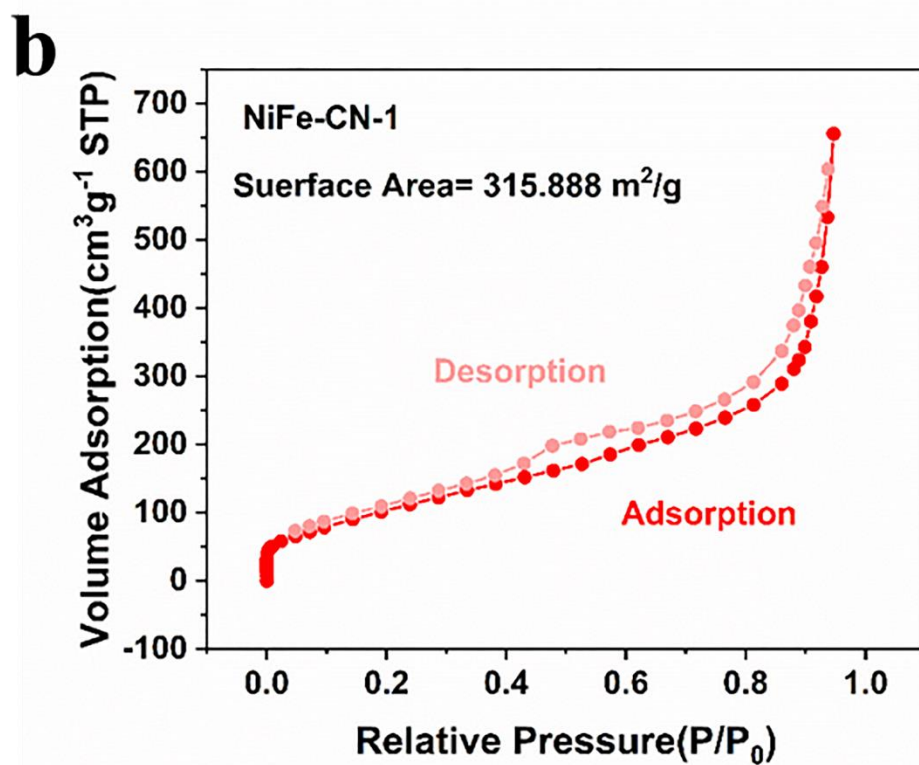

Figure S5. (a, b) Nitrogen adsorption-desorption isotherms of CN and NiFe-CN-1.

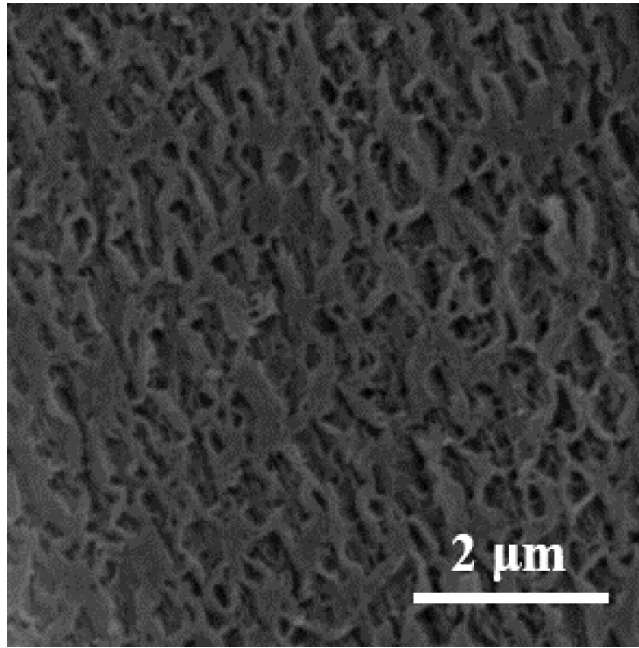

**Figure S6.** SEM image of CN.



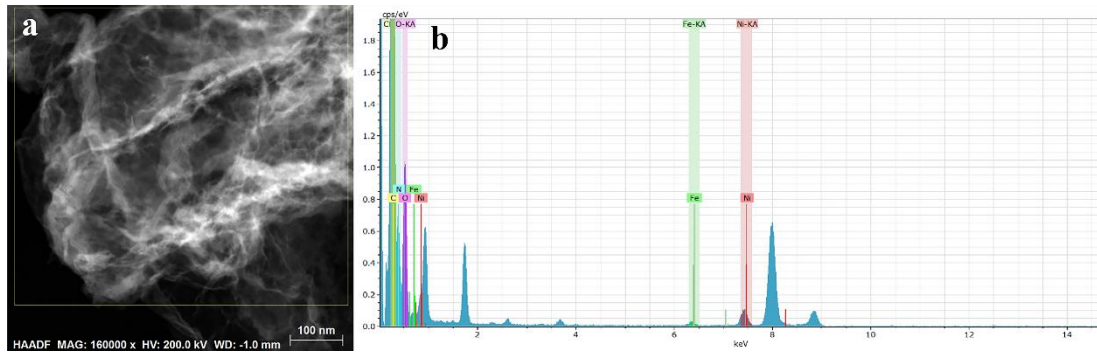

**Figure S7.** EDS of NiFe-NC-1.

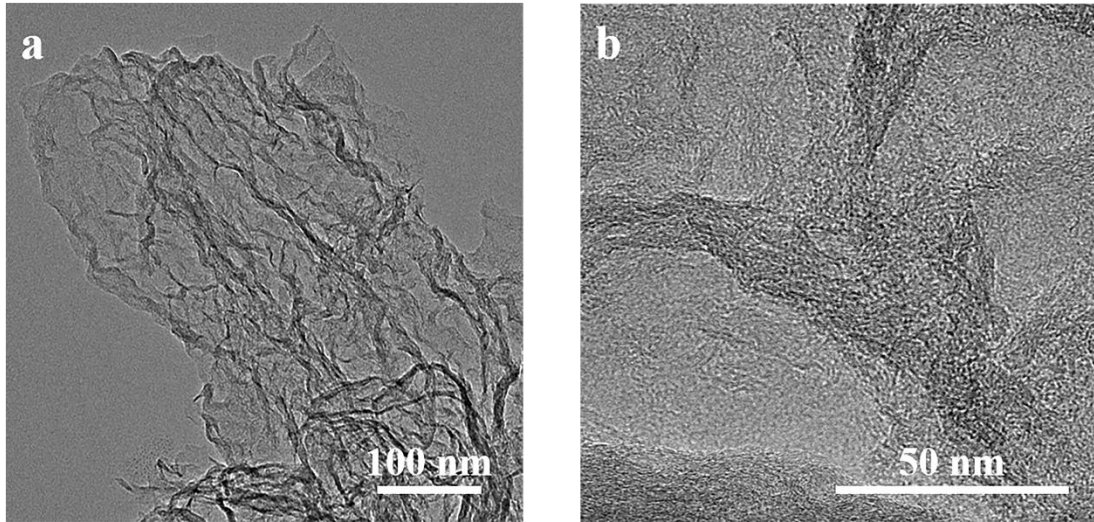

**Figure S8.** (a) TEM images, (b) HRTEM image of NiFe-NC-0.5.

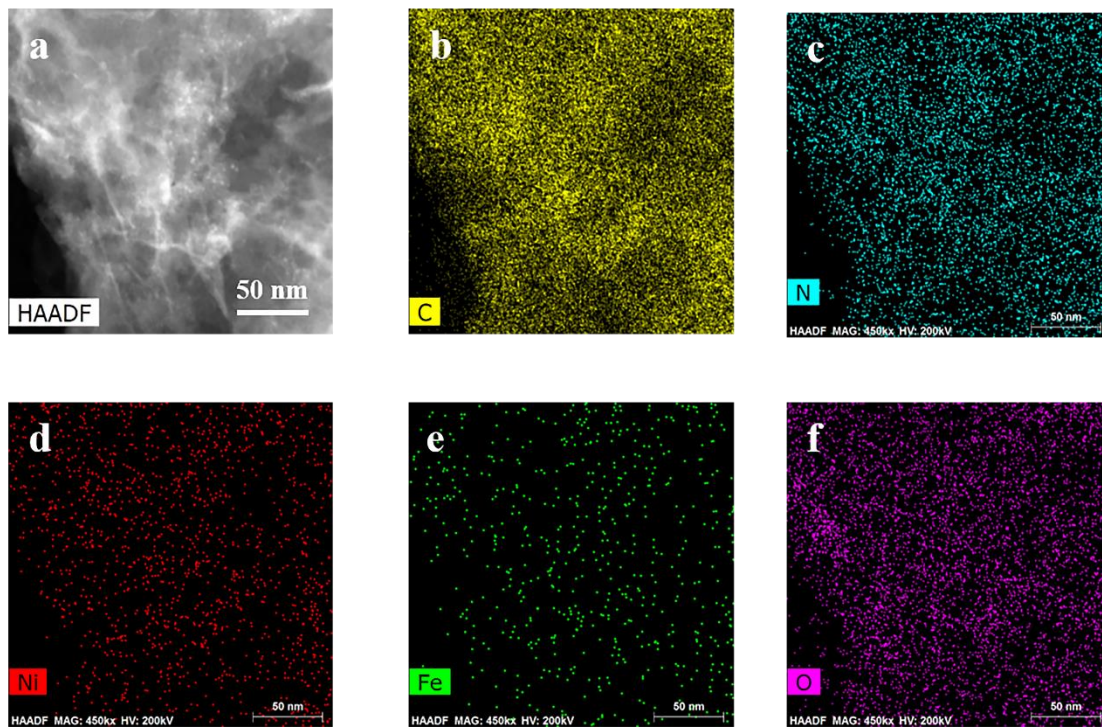

**Figure S9.** (a) STEM image, (b-f) the corresponding elemental mapping images of NiFe-NC-0.5.

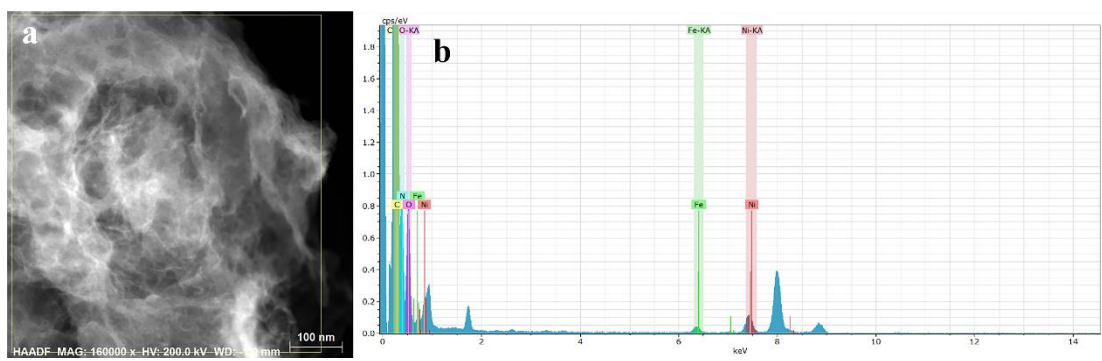

**Figure S10.** EDS of NiFe-NC-0.5.

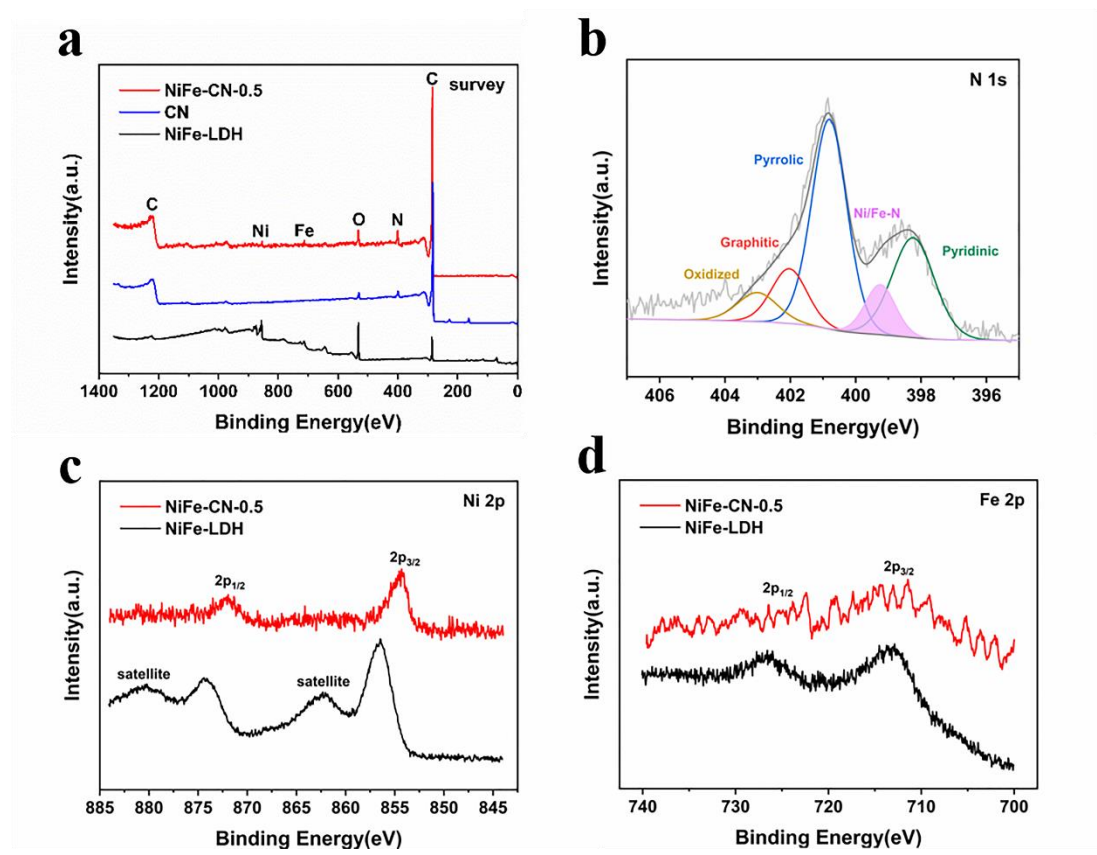

**Figure S11.** (a) XPS spectra of NiFe-LDH and NiFe-CN-0.5. (b) N 1s XPS spectra of NiFe-CN-0.5. (c) Ni 2p XPS spectra of NiFe-LDH and NiFe-CN-0.5. (d) Fe 2p XPS spectra of NiFe-LDH and NiFe-CN-0.5.

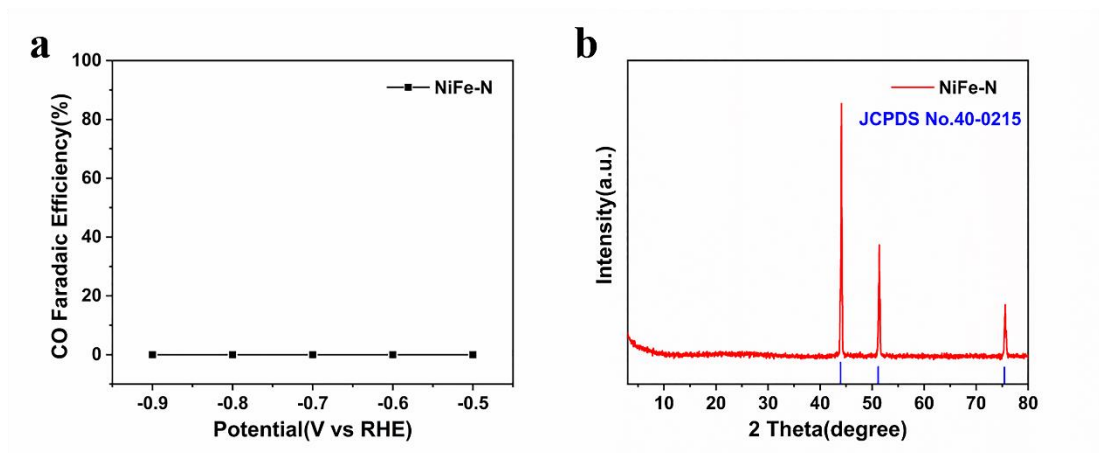

**Figure S12.** (a) Faradaic efficiency of CO of NiFe-N at different potentials in CO<sub>2</sub>-saturated. (b) XRD of NiFe-N.

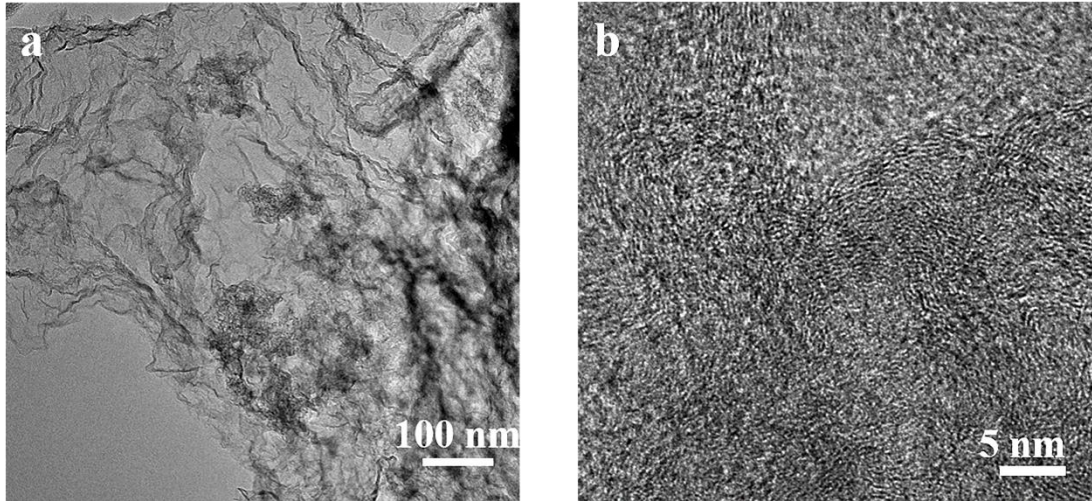

**Figure S13.** (a) TEM images, (b) HRTEM image of NiFe-NC-1 after electrolysis.



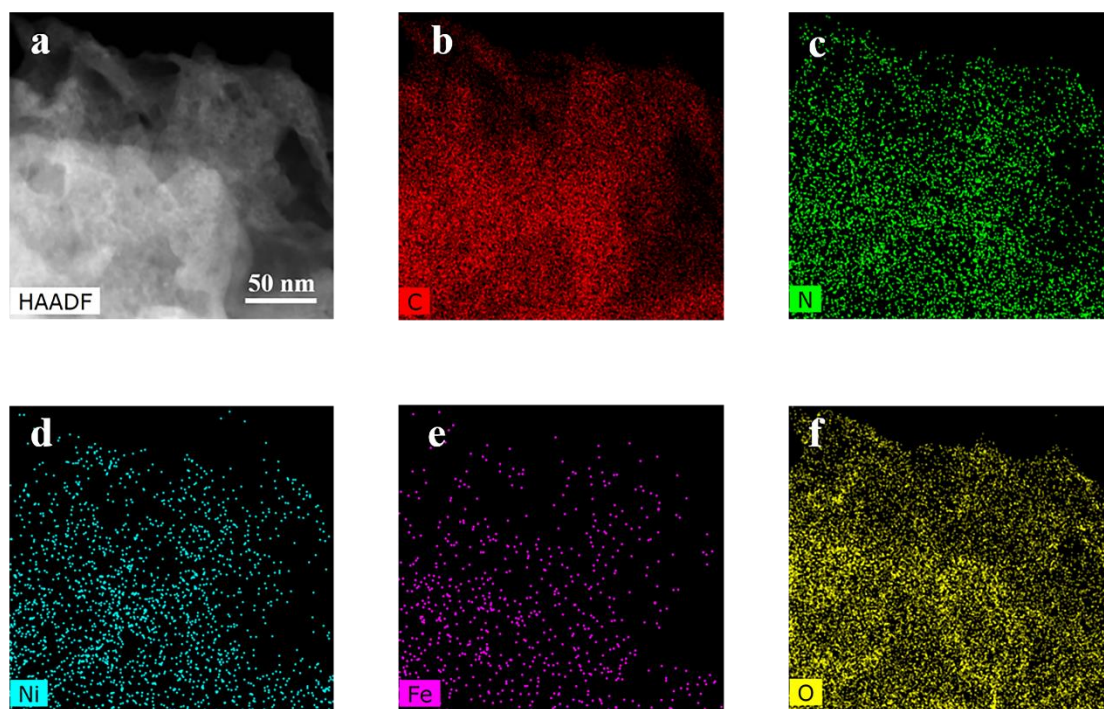

**Figure S14.** (a) STEM image, (b-f) the corresponding elemental mapping images of NiFe-NC-1 after electrolysis.



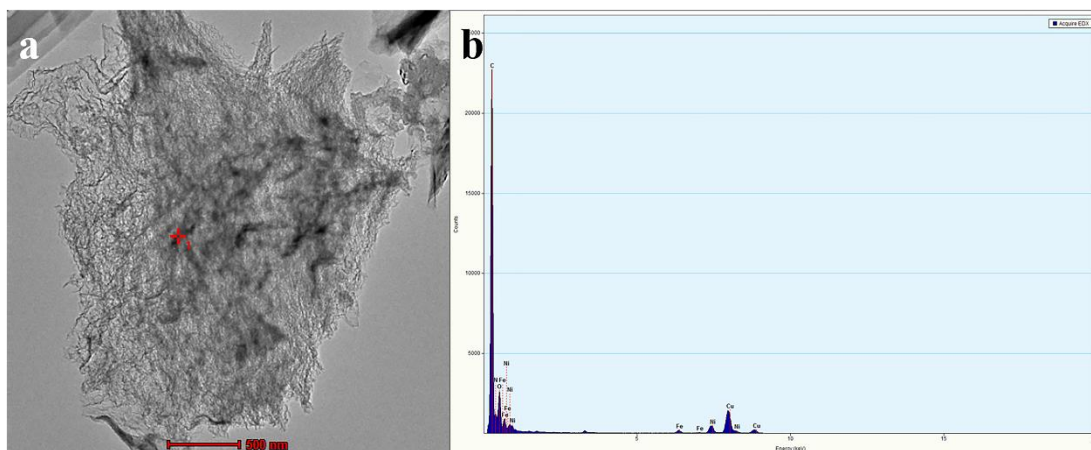

**Figure S15.** EDS of NiFe-NC-1 after electrolysis.

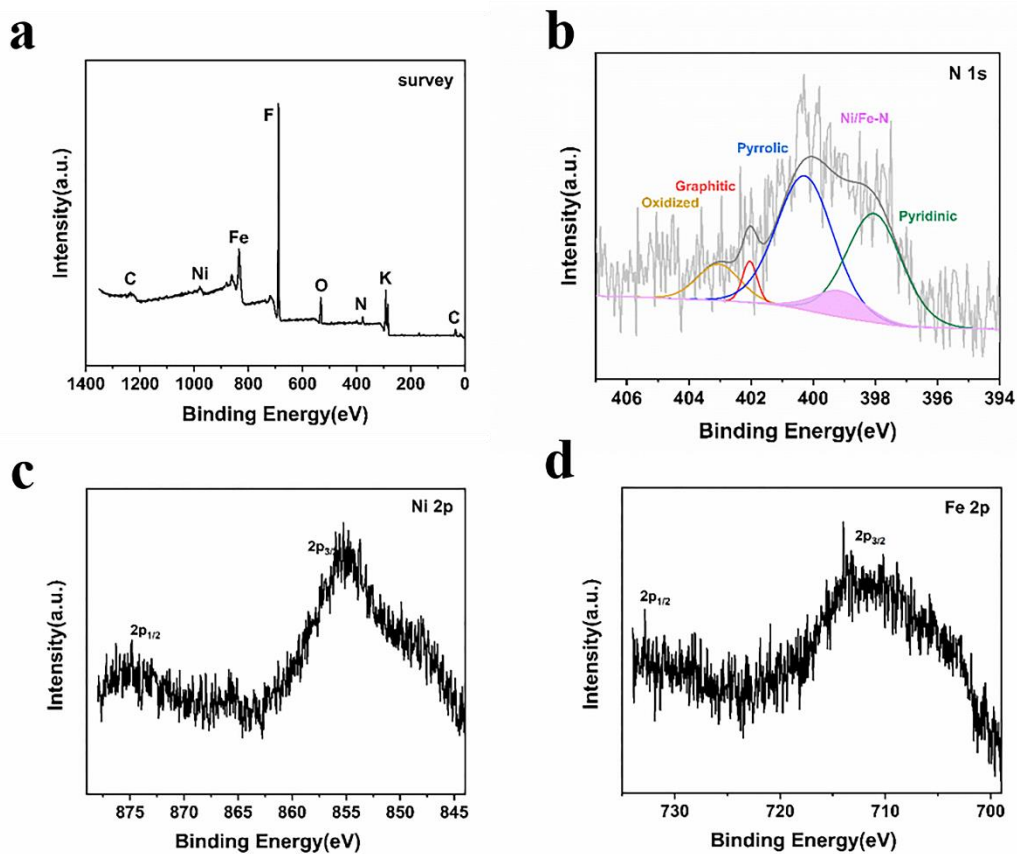

**Figure S16.** (a) XPS spectra of NiFe-CN-1 after electrolysis. (b) N 1s XPS spectra of NiFe-CN-1 after electrolysis. (c) Ni 2p XPS spectra of NiFe-CN-1 after electrolysis. (d) Fe 2p XPS spectra of NiFe-CN-1 after electrolysis.

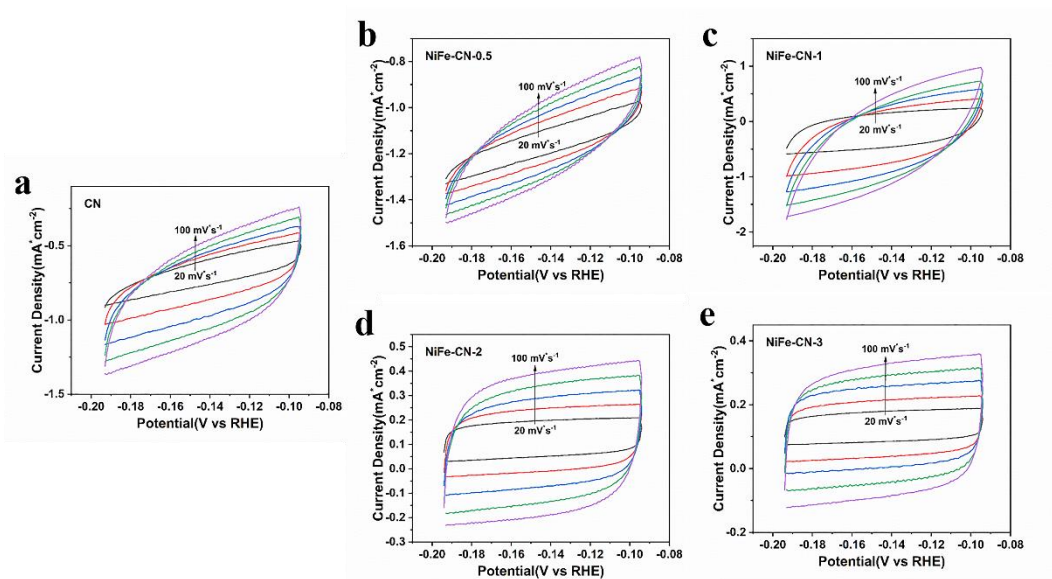

**Figure S17.** The cyclic voltammetry curves at different scan rates (20, 40, 60, 80, and 100  $\text{mV s}^{-1}$ ) of (a) CN, (b) NiFe-NC-0.5, (c) NiFe-NC-1, (d) NiFe-NC-2, and (e) NiFe-NC-3.

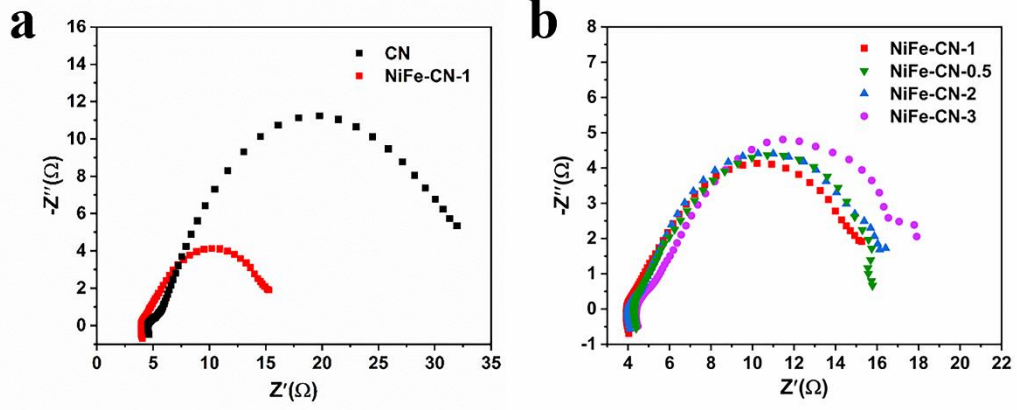

**Figure S18.** Nyquist plots at a potential of -0.8 V (vs RHE) of the samples.

**Table S1.** Evolution of the binding energies of XPS peaks.

| Sample      | Ni 2p <sub>3/2</sub> | Ni 2p <sub>1/2</sub> | Fe 2p <sub>3/2</sub> | Fe 2p <sub>1/2</sub> |
|-------------|----------------------|----------------------|----------------------|----------------------|
| NiFe-LDH    | 856.45               | 874.21               | 713.14               | 726.64               |
| NiFe-NC-0.5 | 854.27               | 871.97               | 713.18               | 726.65               |
| NiFe-NC-1   | 854.46               | 871.90               | 713.25               | 762.81               |

**Table S2.** Raman spectra parameters of CN and NiFe-CN.

| Sample      | D band (cm <sup>-1</sup> ) | G band (cm <sup>-1</sup> ) | I <sub>D</sub> /I <sub>G</sub> |
|-------------|----------------------------|----------------------------|--------------------------------|
| CN          | 1166.83                    | 1398.24                    | 0.83                           |
| NiFe-NC-0.5 | 1777.41                    | 2076.52                    | 0.85                           |
| NiFe-NC-1   | 1141.42                    | 1328.24                    | 0.86                           |
| NiFe-NC-2   | 1188.51                    | 1370.98                    | 0.86                           |
| NiFe-NC-3   | 1235.43                    | 1449.03                    | 0.85                           |

**Table S3.** Comparison of CO<sub>2</sub> reduction performance on various catalysts of the NiFe-NC with recently reported electrocatalysts.

| Catalysts         | Electrolyte             | Potential<br>V (vs RHE) | FE CO<br>(%) | Reference |
|-------------------|-------------------------|-------------------------|--------------|-----------|
| NiFe-NC           | 0.5 M KHCO <sub>3</sub> | -0.8                    | 94.4         | This work |
| FeMn-N-C          | 0.1 M KHCO <sub>3</sub> | -0.65                   | 80           | 1         |
| Fe-N-C/Graphene   | 0.1 M KHCO <sub>3</sub> | -0.5                    | 80           | 2         |
| NFe-CNT/CNS       | 0.5 M KHCO <sub>3</sub> | -0.6                    | 60           | 3         |
| NiSAs/N-C         | 0.5 M KHCO <sub>3</sub> | -0.89                   | 71.9         | 4         |
| CoNi-NC           | 0.1 M KHCO <sub>3</sub> | -0.5                    | 55           | 5         |
| CNT-N-NiFe        | 0.5 M KHCO <sub>3</sub> | -0.7                    | 82           | 6         |
| Cu-Sn NWs         | 0.1 M KHCO <sub>3</sub> | -0.7                    | 82           | 7         |
| CoPc-CN/CNT(3.5%) | 0.1 M KHCO <sub>3</sub> | -0.97                   | 95           | 8         |
| CuPd NP/C         | 0.1 M KHCO <sub>3</sub> | -0.9                    | 87           | 9         |
| Au-Cu NP/C        | 0.5 M KHCO <sub>3</sub> | -0.7                    | 50           | 10        |

## REFERENCES

1. A. S. Varela, N. R. Sahraie, J. Steinberg, W. Ju, H. S. Oh and P. Strasser, *Angew Chem Int Edit*, 2015, **54**, 10758-10762.
2. C. H. Zhang, S. Z. Yang, J. J. Wu, M. J. Liu, S. Yazdi, M. Q. Ren, J. W. Sha, J. Zhong, K. Q. Nie, A. S. Jalilov, Z. Y. Li, H. M. Li, B. I. Yakobson, Q. Wu, E. L. Ringe, H. Xu, P. M. Ajayan and J. M. Tour, *Adv Energy Mater*, 2018, **8**, 1703487.
3. F. P. Pan, H. L. Zhao, W. Deng, X. H. Feng and Y. Li, *Electrochim Acta*, 2018, **273**, 154-161.
4. C. M. Zhao, X. Y. Dai, Y. Tao, W. X. Chen, X. Q. Wang, J. Wang, J. Yang, S. Q. Wei, Y. Wu and Y. D. Li, *J Am Chem Soc* **2017**, 139, 8078.
5. Q. He, D. Liu, J. H. Lee, Y. Liu, Z. Xie, S. Hwang, S. Kattel, L. Song and J. G.

- Chen, *Angew Chem Int Edit*, 2020, **59**, 3033-3037.
6. H. Chen, P. Zhang, R. S. Xie, Y. Xiong, C. H. Jia, Y. K. Fu, P. A Song, L. Chen, Y. P. Zhang and T. Liao, *Adv Mater Interfaces*, 2021, **8**, 2101165..
  7. W. B. Ju, F. Z. Jiang, H. Ma, Z. Y. Pan, Y. B. Zhao, F. Pagani, D. Rentsch, J. Wang and C. Battaglia, *Adv Energy Mater*, 2019, **9**, 1901514.
  8. X. Zhang, Z. S. Wu, X. Zhang, L. W. Li, Y. Y. Li, H. M. Xu, X. X. Li, X. L. Yu, Z. S. Zhang, Y. Y. Liang and H. L. Wang, *Nat Commun*, 2017, **8**, 14675.
  9. Y. Mun, S. Lee, A. Cho, S. Kim, J. W. Han and J. Lee, *Appl Catal B-Environ*, 2019, **246**, 82-88.
  10. J. H. Zhou, D.W. Lan, S. S. Yang, Y. Guo, K. Yuan, L. X. Dai and Y. W. Zhang, *Inorg Chem Front*, 2018, **5**, 1524-1532.
